# Supplementary material for: The Five AhMTP1 Zinc Transporters Undergo Different Evolutionary Fates towards Adaptive Evolution to Zinc Tolerance in Arabidopsis halleri
Source: PubMed Central journal article supplement (PMC2855318; doi:10.1371/journal.pgen.1000911), 2010-04-15
Supplement: pgen.1000911.s001.pdf [file pgen.1000911.s001.pdf]

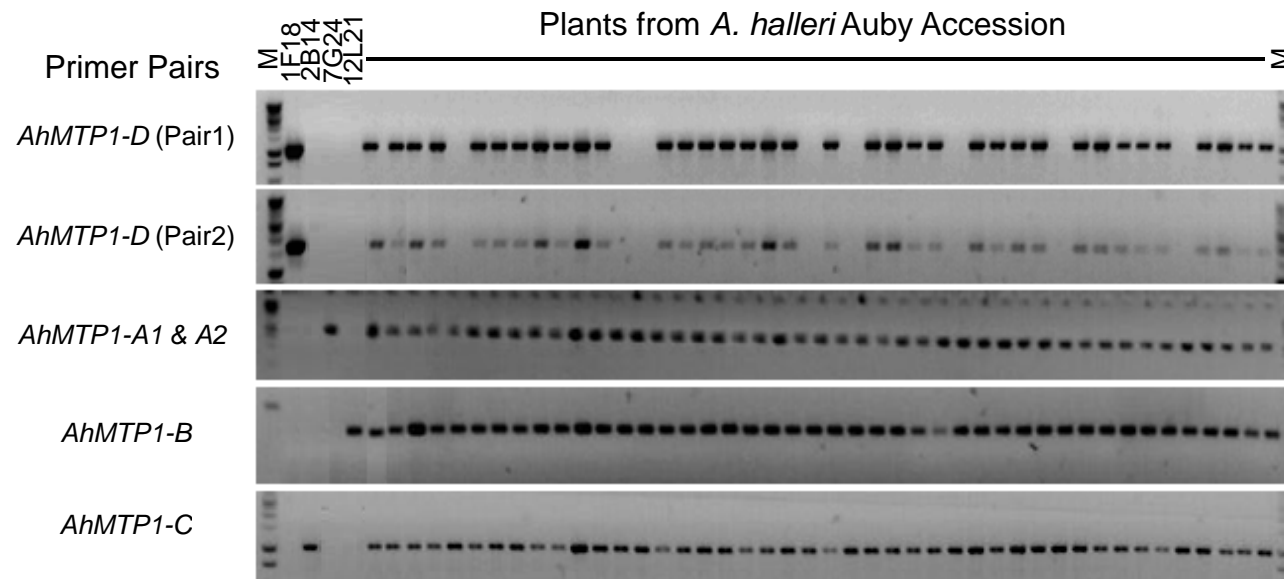

**Figure S1; Analysis of the presence of the *AhMTP1* paralogues in 44 plants from the Auby accession using gene copy specific primer pairs.** Each of the horizontal panel show the amplification obtained from a primer pair specific to the *MTP1* paralogue named at the left of the panel. Samples from BAC clones 1F18, 2B14, 7G24 and 12L21 were used as controls for specificity of the primer pairs. The lane M represents 1kb invitrogen DNA ladder.
