# Supplementary material for: The Five AhMTP1 Zinc Transporters Undergo Different Evolutionary Fates towards Adaptive Evolution to Zinc Tolerance in Arabidopsis halleri
Source: PLoS Genet. 2010 Apr 15;6(4):e1000911. doi: 10.1371/journal.pgen.1000911 (PMC2855318; doi:10.1371/journal.pgen.1000911)
Supplement: Table S2 — Threshold cycles (Ct) obtained in quantitative RT-PCR analyses performed on cDNAs coming from shoots and roots of A. halleri plants. (0.06 MB XLS) [file pgen.1000911.s003.xls]

## Sheet: Sheet1
Table S2; Threshold cycles (Ct) obtained in quantitative RT-PCR analyses performed on cDNAs coming from shoots and roots of A. halleri plants
				Ct values					Ct values
	Zinc (µm)	Sample	Dilution Factor	Actin	AhMTP1-A1 & A2	AhMTP1-B		Dilution Factor	AhMTP1-C	AhMTP1-D
Shoots	10	S1	3X	27.56	26.34	24.58		3X	34.17	35.69
	10	S1	12X	29.63	28.22	26.48		3X	34.44	35.78
	10	S1	48X	32.12	30.45	28.51		3X	34.14	35.67
	10	S2	3X	27.67	26.14	24.62		3X	34.16	35.25
	10	S2	12X	29.7	28.05	26.58		3X	34.53	35.81
	10	S2	48X	32	30.29	28.52		3X	34.81	37.75
	10	S3	3X	27.93	26.1	25.53		3X	35.45	36.05
	10	S3	12X	30.43	27.77	26.64		3X	35.93	35.46
	10	S3	48X	32.18	29.88	28.58		3X	35.27	34.84
	10	S4	3X	27.57	25.63	25.43		3X	34.66	35.56
	10	S4	12X	29.81	27.67	27		3X	34.75	34.69
	10	S4	48X	31.83	29.86	29.22		3X	34.33	35.57
	10	S5	3X	27.61	26.16	24.61		3X	34.02	35.35
	10	S5	12X	30.04	28.16	26.46		3X	33.92	35.15
	10	S5	48X	31.68	29.91	28.64		3X	34.52	34.62
	10	S6	3X	27.78	26.04	25.02		3X	34.79	36.07
	10	S6	12X	30	27.98	26.26		3X	35.72	36.05
	10	S6	48X	32.06	30.48	29.28		3X	35.46	36.52
	100	S1	3X	27.86	26	24.56		3X	35.42	36.14
	100	S1	12X	30.17	27.77	26.23		3X	34.61	35.95
	100	S1	48X	32.57	29.88	28.47		3X	34.5	36.22
	100	S2	3X	27.71	25.93	24.6		3X		35.62
	100	S2	12X	29.86	28.16	26.42		3X	34.27	35.75
	100	S2	48X	32.2	29.95	28.64		3X	35.26	35.31
	100	S3	3X	27.84	26.33	25.14		3X	33.91	36
	100	S3	12X	29.68	28.06	26.26		3X	35.59	35.26
	100	S3	48X	32.02	30.47	28.62		3X	34.46	38.65
	100	S4	3X	27.92	26.16	24.78		3X		36.43
	100	S4	12X	29.71	28.19	26.85		3X	33.49
	100	S4	48X	32	30.56	28.55		3X	34.67	35.27
	100	S5	3X	27.82	26.14	24.91		3X	33.77	35.53
	100	S5	12X	30.09	28.53	26.75		3X	34.61	36.79
	100	S5	48X	32.05	30.27	29.49		3X	34.25	35.06
	100	S6	3X	27.75	26.12	25.29		3X	35.16	36.08
	100	S6	12X	29.78	28.5	26.84		3X	34.69	35.81
	100	S6	48X	31.86	30.44	28.6		3X	35.32	35.32
	300	S1	3X	28.07	25.78	24.84		3X	35.73	37.71
	300	S1	12X	29.96	27.7	27.19		3X	35.17	36.91
	300	S1	48X	32.51	30.1	28.58		3X	35.23	38.85
	300	S2	3X	27.98	26.22	24.83		3X	35.89	37.03
	300	S2	12X	29.99	28.17	26.58		3X	40	36.94
	300	S2	48X	32.27	30.28	29.49		3X	40
	300	S3	3X	28.18	26.32	24.88		3X	38.95
	300	S3	12X	29.71	28.34	26.49		3X	37.22	38.39
	300	S3	48X	32.21	30.11	28.72		3X	35.54	38.01
	300	S4	3X	27.74	26.24	25.16		3X	36.68	35.93
	300	S4	12X	30.02	28.46	26.88		3X	35.87	40
	300	S4	48X	32.12	30.51	29.18		3X
	300	S5	3X	28.1	26.03	24.81		3X	34.12	37.86
	300	S5	12X	29.88	28.01	26.59		3X	36.08
	300	S5	48X	32.7	30.16	28.75		3X	35.62	37.43
	300	S6	3X	27.91	26.21	25.02		3X	38.06
	300	S6	12X	30.64	28.27	26.55		3X	36.05
	300	S6	48X	31.99	30.71	28.72		3X	35.6	39.05
	1000	S1	3X	27.94	26.23	25.45		3X	36.16	37.34
	1000	S1	12X	30.51	28.46	27.06		3X	36.81	37.43
	1000	S1	48X	32.32	30.51	29.2		3X	36.23
	1000	S2	3X	27.73	26.18	24.75		3X	35.8	37.65
	1000	S2	12X	29.83	28.62	26.27		3X	36.14	36.78
	1000	S2	48X	32.25	30.47	28.52		3X	35.71	36.04
	1000	S3	3X	27.75	25.86	24.63		3X	36.9
	1000	S3	12X	30.12	28.54	26.54		3X	36.86	37.83
	1000	S3	48X	31.84	30.35	29.06		3X	35.86	39.16
	1000	S4	3X	28.16	26.02	25.27		3X	36.1	38.22
	1000	S4	12X	30.25	28.21	27.01		3X	35.66	36.92
	1000	S4	48X	32.52	30.47	29.03		3X	36.57
	1000	S5	3X	28.07	26.08	24.56		3X	35.58	38.82
	1000	S5	12X	30.04	27.99	26.32		3X	36.12
	1000	S5	48X	32.7	30.43	28.85		3X	36.83	37.83
	1000	S6	3X	28.03	26.65	25.63		3X	36.45	37.9
	1000	S6	12X	29.82	27.91	26.92		3X		37.37
	1000	S6	48X	32.18	30.97	29.1		3X	36.7	39.22
Roots	10	R1	3X	27.95	28.2	24.75		3X	35.6	35.18
	10	R1	12X	30.15	30.53	26.41		3X	34.72	35.77
	10	R1	48X	32.42	32.75	28.46		3X	34.04	35.34
	10	R2	3X	27.58	28.21	25.15		3X	36	36.62
	10	R2	12X	29.55	30.42	27.09		3X	34.75	35.95
	10	R2	48X	31.79	32.43	28.5		3X	35.42	36.8
	10	R3	3X	27.68	28.49	25.16		3X	34.04	34.32
	10	R3	12X	29.86	30.77	26.32		3X	33.32	35.57
	10	R3	48X	31.9	32.48	28.53		3X	34.35	34.27
	10	R4	3X	27.88	28.17	24.79		3X	34.71	36.29
	10	R4	12X	30.45	30.11	26.26		3X	33.86	35.07
	10	R4	48X	32.44	32.5	28.43		3X	35.32	34.89
	10	R5	3X	27.96	28.47	24.51		3X	34	34.53
	10	R5	12X	30.27	30.46	26.18		3X	34.01	35.94
	10	R5	48X	32.58	32.65	28.52		3X	35.08	35.18
	10	R6	3X	27.74	28.33	24.74		3X	34.84	34.9
	10	R6	12X	29.72	30.43	26.2		3X	34.16	36.09
	10	R6	48X	31.74	32.55	28.55		3X	34.81	35.51
	100	R1	3X	27.64	28.08	25.16		3X	34.72	40
	100	R1	12X	30.07	29.91	26.88		3X	36.42
	100	R1	48X	31.91	32.05	29.18		3X	33.68	36.17
	100	R2	3X	27.65	28.2	25.32		3X	33.71	40
	100	R2	12X	29.68	30.47	26.97		3X	33.78
	100	R2	48X	31.87	32.62	29.3		3X	34.54	36.09
	100	R3	3X	27.6	28.06	24.31		3X	35.79
	100	R3	12X	29.78	30.34	26.33		3X	34.9	34.54
	100	R3	48X	32.29	32.67	28.32		3X	36.08	36.87
	100	R4	3X	28.04	28.08	24.32		3X	34.9	35.33
	100	R4	12X	30.28	29.96	26.27		3X	35.6	37.76
	100	R4	48X	32.32	32.51	28.43		3X		35.44
	100	R5	3X	27.79	28.01	24.67		3X	34.15	35.12
	100	R5	12X	29.98	30.68	26.9		3X	34.07	37.1
	100	R5	48X	32.03	32.73	28.44		3X	35.76	38.11
	100	R6	3X	28.12	28.15	24.74		3X	32.22	35.74
	100	R6	12X	30.17	29.98	26.27		3X	35.32	35.69
	100	R6	48X	32.59	32.18	28.59		3X	33.87	37.46
	300	R1	3X	27.89	26.5	24.15		3X	35.75
	300	R1	12X	30.12	28.81	26.55		3X	35.88	40
	300	R1	48X	32.16	30.65	28.53		3X	37.43	38.27
	300	R2	3X	28.04	26.5	24.09		3X	37.07	39.4
	300	R2	12X	30.28	28.67	26.02		3X		36.82
	300	R2	48X	32.32	30.7	28.14		3X	35.91	38.15
	300	R3	3X	27.63	26.34	24.69		3X	37.01	38.22
	300	R3	12X	30	28.46	26.12		3X		40
	300	R3	48X	31.96	30.44	28.99		3X	35.66	40
	300	R4	3X	27.81	26.06	24.62		3X	34.29	37.79
	300	R4	12X	30.51	28.64	26.51		3X	36.02	37.4
	300	R4	48X	31.79	30.45	28.18		3X	37.77	37.81
	300	R5	3X	28.03	26.72	25.58		3X	36.55	37.93
	300	R5	12X	29.99	28.87	26.99		3X	35.55	37.96
	300	R5	48X	32.68	30.77	29.26		3X	36.01	36.24
	300	R6	3X	27.82	26.34	24.25		3X	35.16	36.67
	300	R6	12X	29.93	28.22	26.17		3X		36.81
	300	R6	48X	32.16	30.45	28.48		3X	35.67
	1000	R1	3X	27.95	25.98	24.41		3X	36.07	40
	1000	R1	12X	30.15	28.59	26.6		3X	35.92	36.9
	1000	R1	48X	32.42	30.52	28.45		3X		36.78
	1000	R2	3X	27.85	26.09	24.28		3X	34.86	36.81
	1000	R2	12X	29.93	28.19	26.17		3X	36.17	36.15
	1000	R2	48X	32.26	30.2	28.26		3X	38.1	38.4
	1000	R3	3X	27.83	25.98	24.09		3X	37.07	35.78
	1000	R3	12X	29.91	28.22	25.99		3X	35.9	38.26
	1000	R3	48X	32.12	30.43	28.1		3X	36.07	39.04
	1000	R4	3X	27.83	25.88	24.26		3X	36.17
	1000	R4	12X	29.95	28.27	26.24		3X		37.81
	1000	R4	48X	31.78	29.94	28.46		3X	35.28	40
	1000	R5	3X	27.82	26.05	24.29		3X	37.4	38.14
	1000	R5	12X	29.95	28.08	26.17		3X		40
	1000	R5	48X	31.98	30.22	28.25		3X	36.81	38.21
	1000	R6	3X	27.77	25.96	24.11		3X	35.06	38.03
	1000	R6	12X	29.75	28.05	25.96		3X	35.56	38.13
	1000	R6	48X	32.44	30.43	28.12		3X		37.87
